# Supplementary material for: The clinical heterogeneity of coenzyme Q10 deficiency results from genotypic differences in the Coq9 gene
Source: PubMed Central journal article supplement (PMC4492823; doi:10.15252/emmm.201404632), 2015-03-23

**Figure S4. Panel A. Levels of COQ biosynthetic proteins in cerebrum**

(A) Cerebrum western blot of COQ7.

**A**

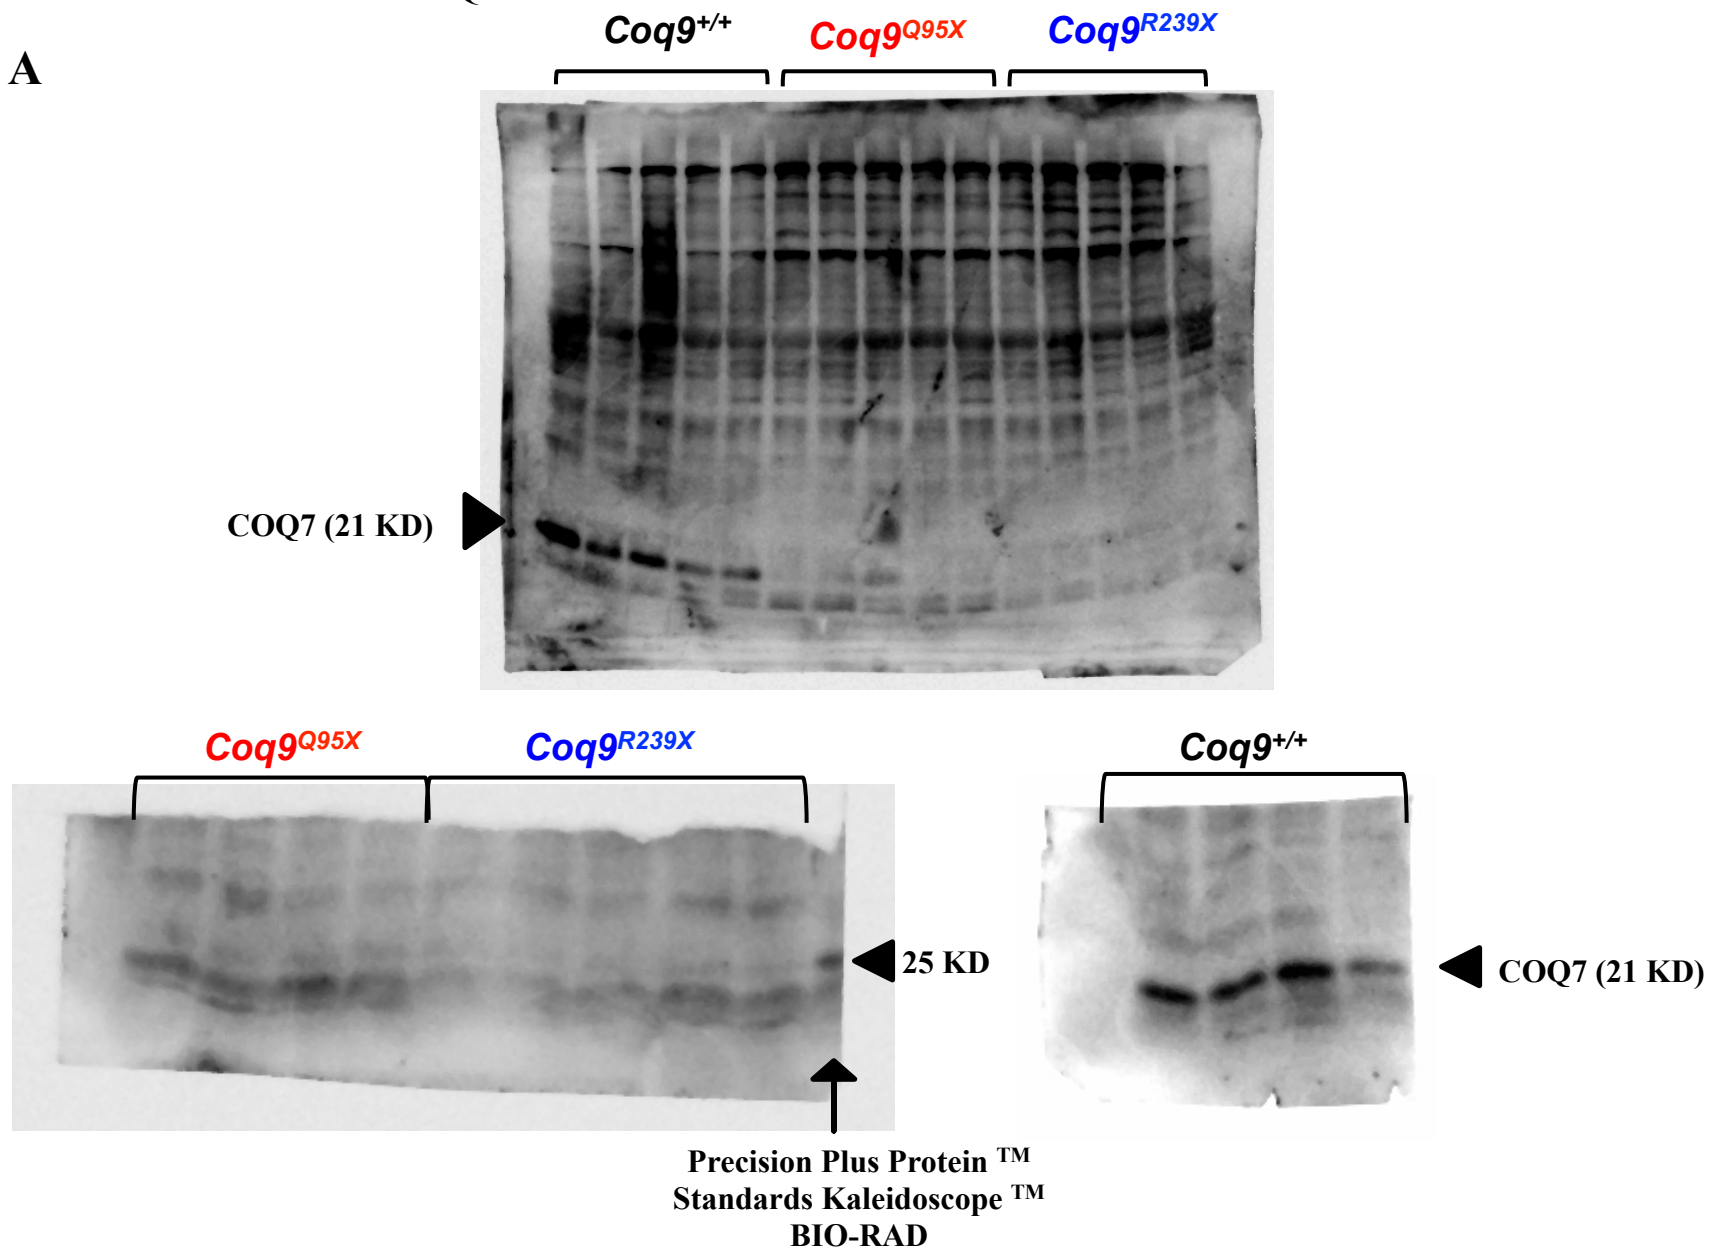

**Figure S4. Panel B. Levels of COQ biosynthetic proteins in cerebrum**

(B) Cerebrum western blot of ADCK3.

**B**

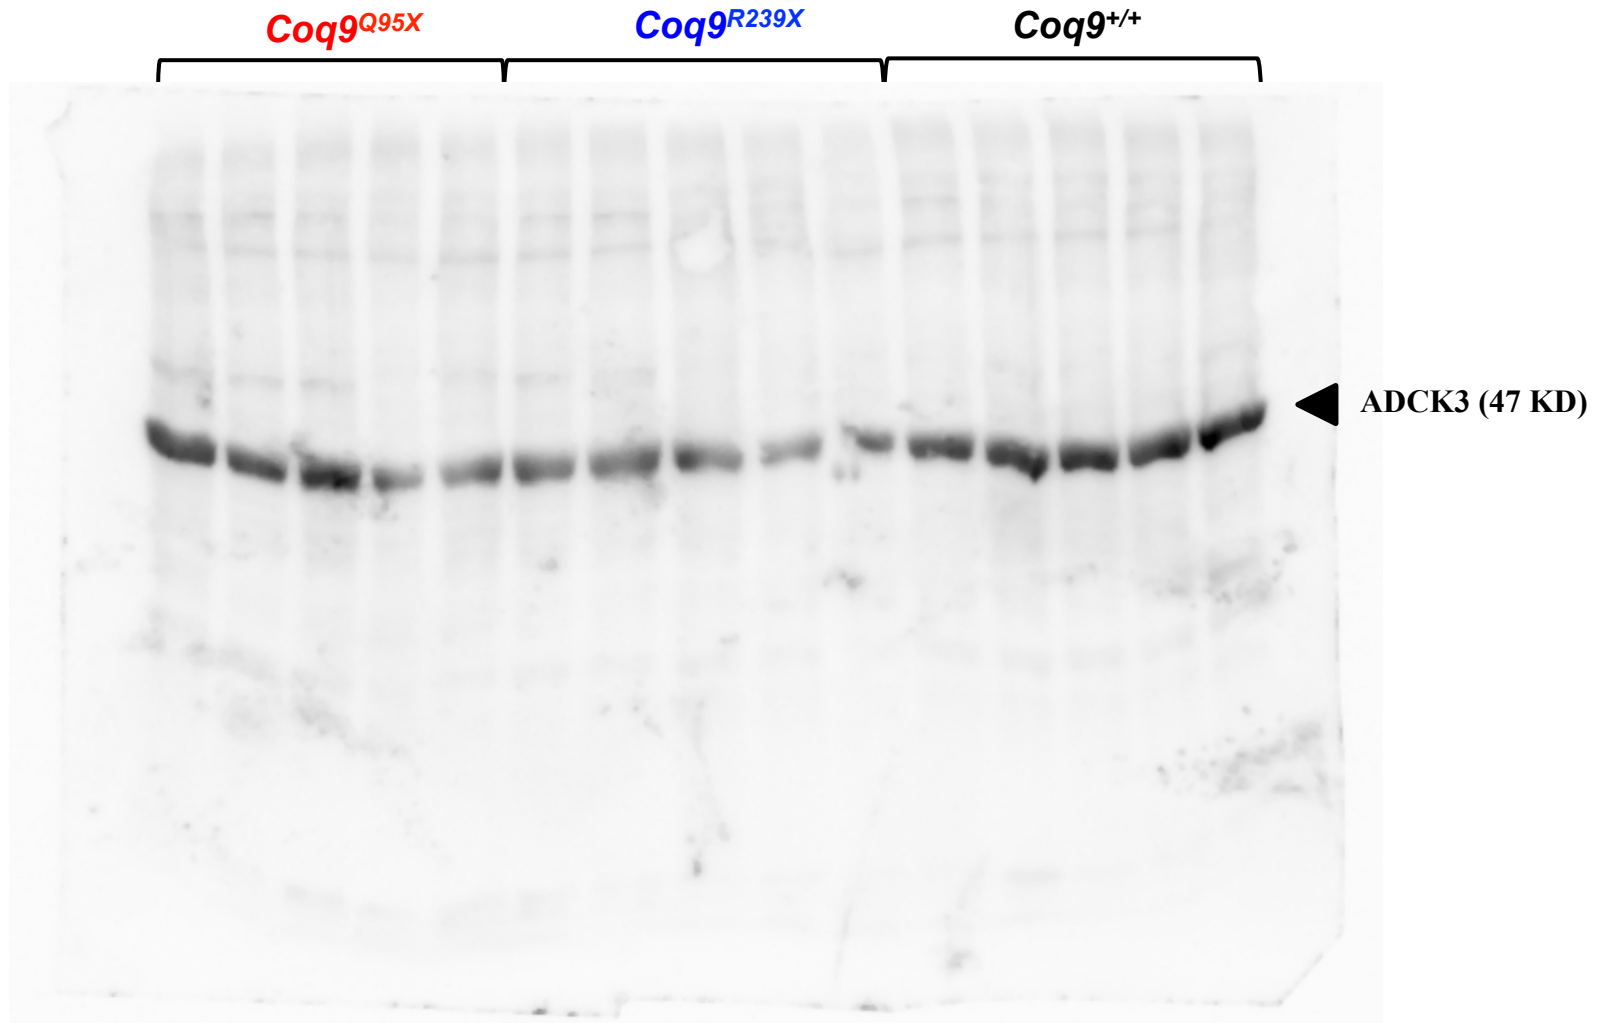

**Figure S4. Panel C. Levels of COQ biosynthetic proteins in cerebrum**

(C) Cerebrum western blot of COQ5.

**C**

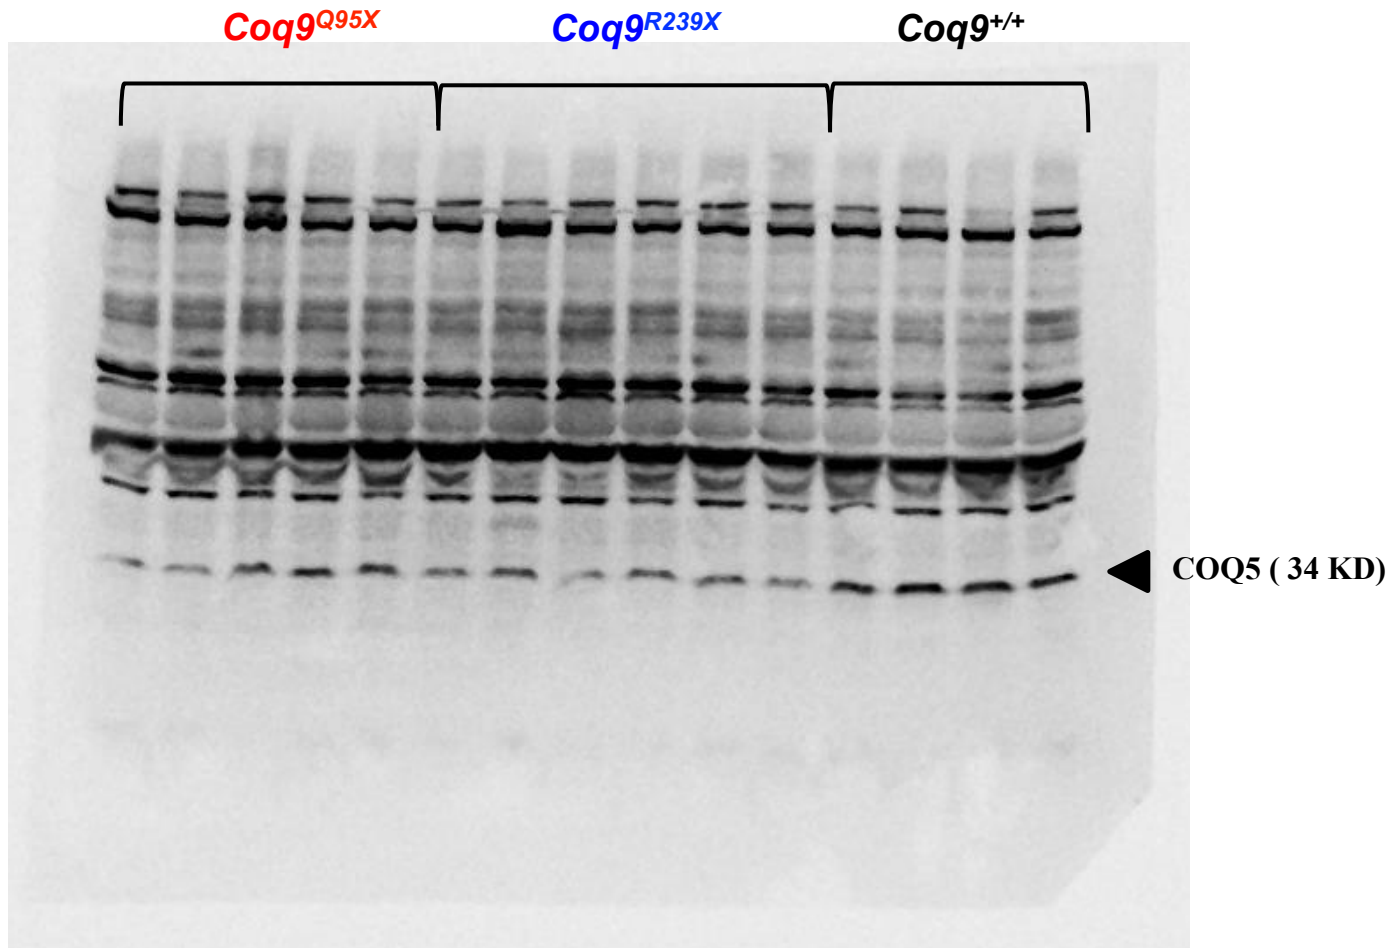

Supplement: emmm0007-0670-sd15.pdf [file emmm0007-0670-sd15.pdf]
