# Supplementary material for: The clinical heterogeneity of coenzyme Q10 deficiency results from genotypic differences in the Coq9 gene
Source: PubMed Central journal article supplement (PMC4492823; doi:10.15252/emmm.201404632), 2015-03-23

**Figure 1. Panel B. Western blot images of COQ9 protein.**

(B) Kidney homogenate western blot of COQ9

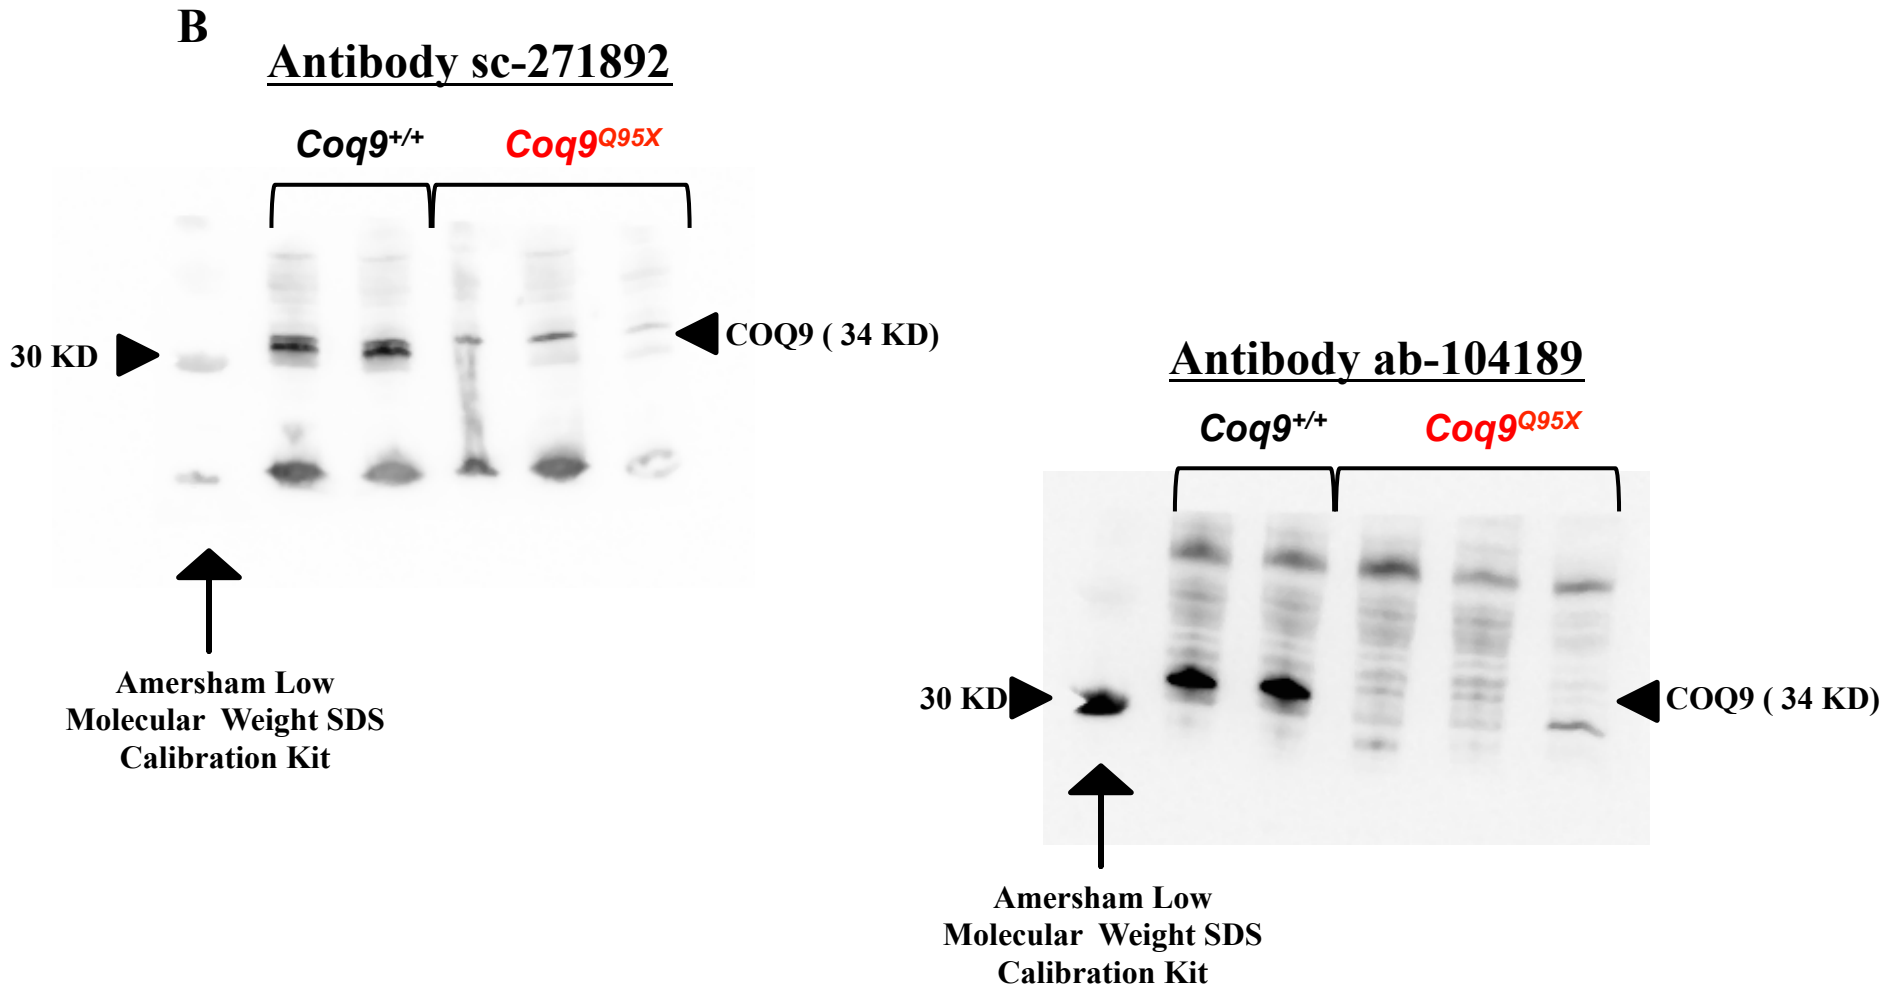

Supplement: emmm0007-0670-sd17.pdf [file emmm0007-0670-sd17.pdf]
