# Supplementary material for: The clinical heterogeneity of coenzyme Q10 deficiency results from genotypic differences in the Coq9 gene
Source: PubMed Central journal article supplement (PMC4492823; doi:10.15252/emmm.201404632), 2015-03-23

Figure 2E. Truncated COQ9 protein in *Coq9*<sup>R239X</sup> mice.

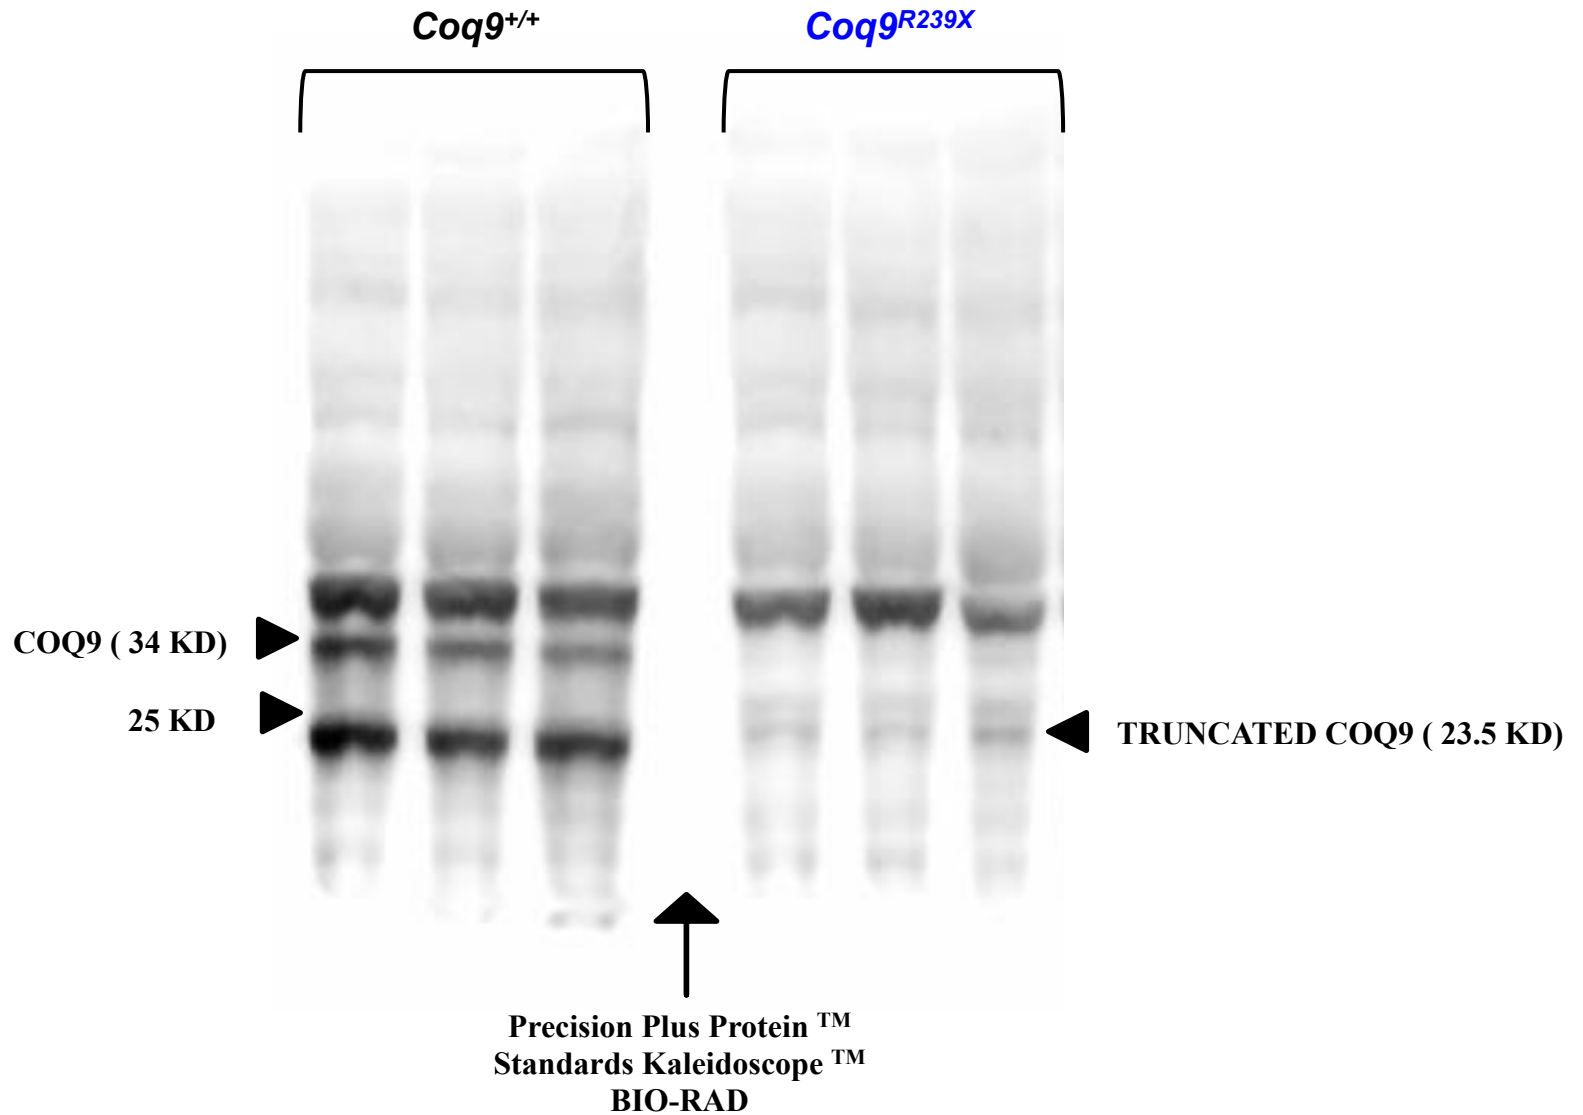

Supplement: emmm0007-0670-sd18.pdf [file emmm0007-0670-sd18.pdf]
