# Supplementary material for: The clinical heterogeneity of coenzyme Q10 deficiency results from genotypic differences in the Coq9 gene
Source: PubMed Central journal article supplement (PMC4492823; doi:10.15252/emmm.201404632), 2015-03-23

**Figure 5. Panel A. Levels of Coq biosynthetic proteins**

(A) Kidney western blot of COQ7 and VDAC1 as a loading control.

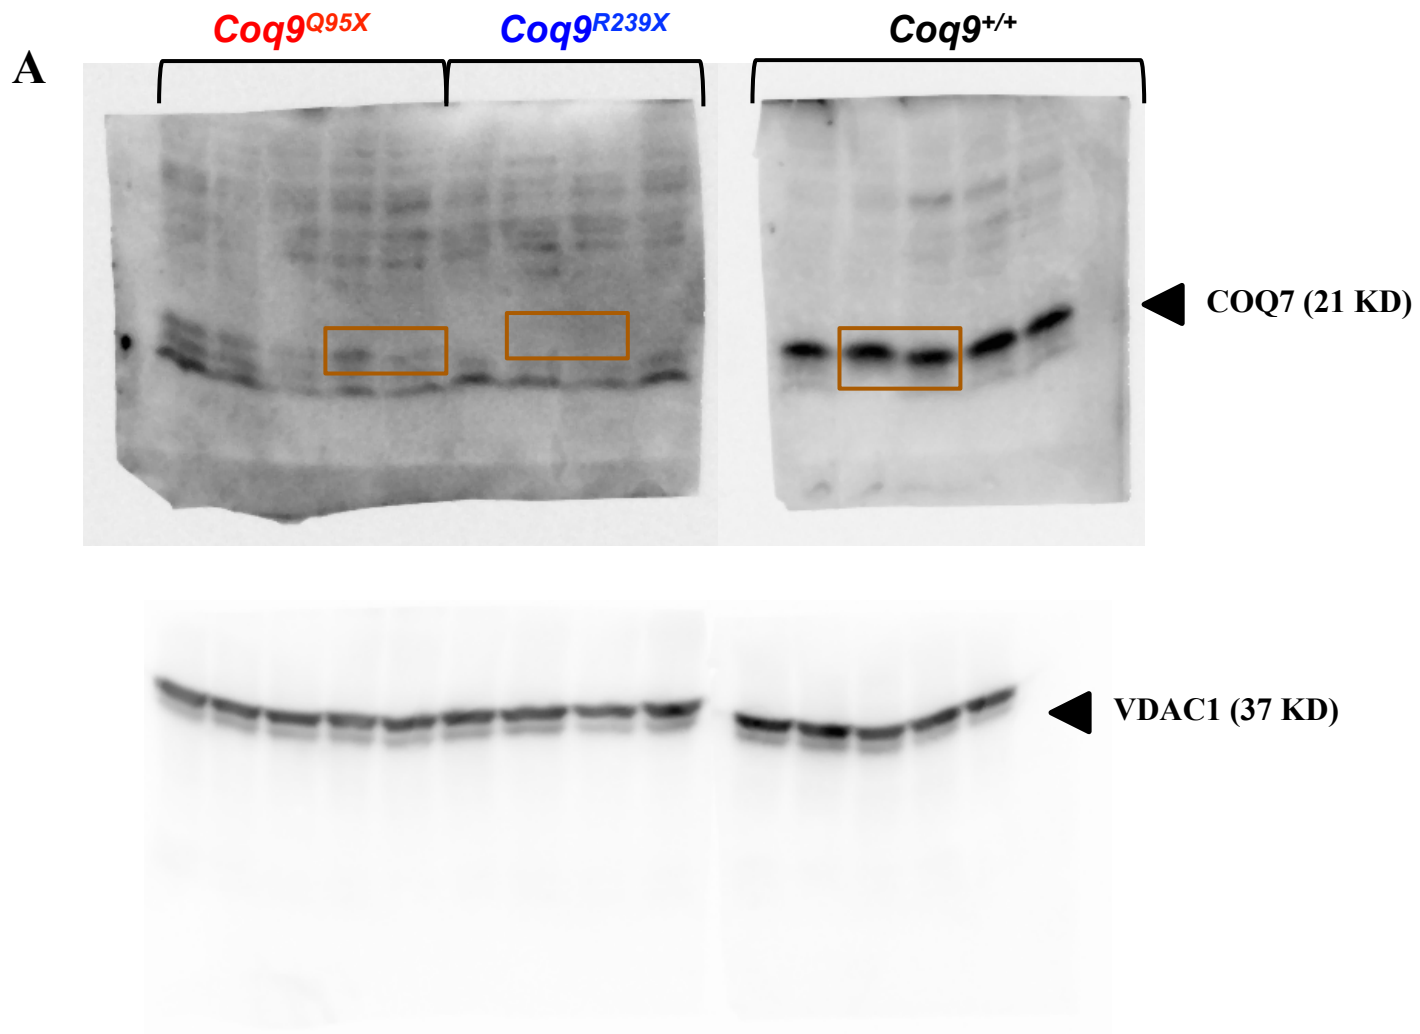

**Figure 5. Panel B. Levels of Coq biosynthetic proteins**

(B) Kidney western blot of ADCK3.

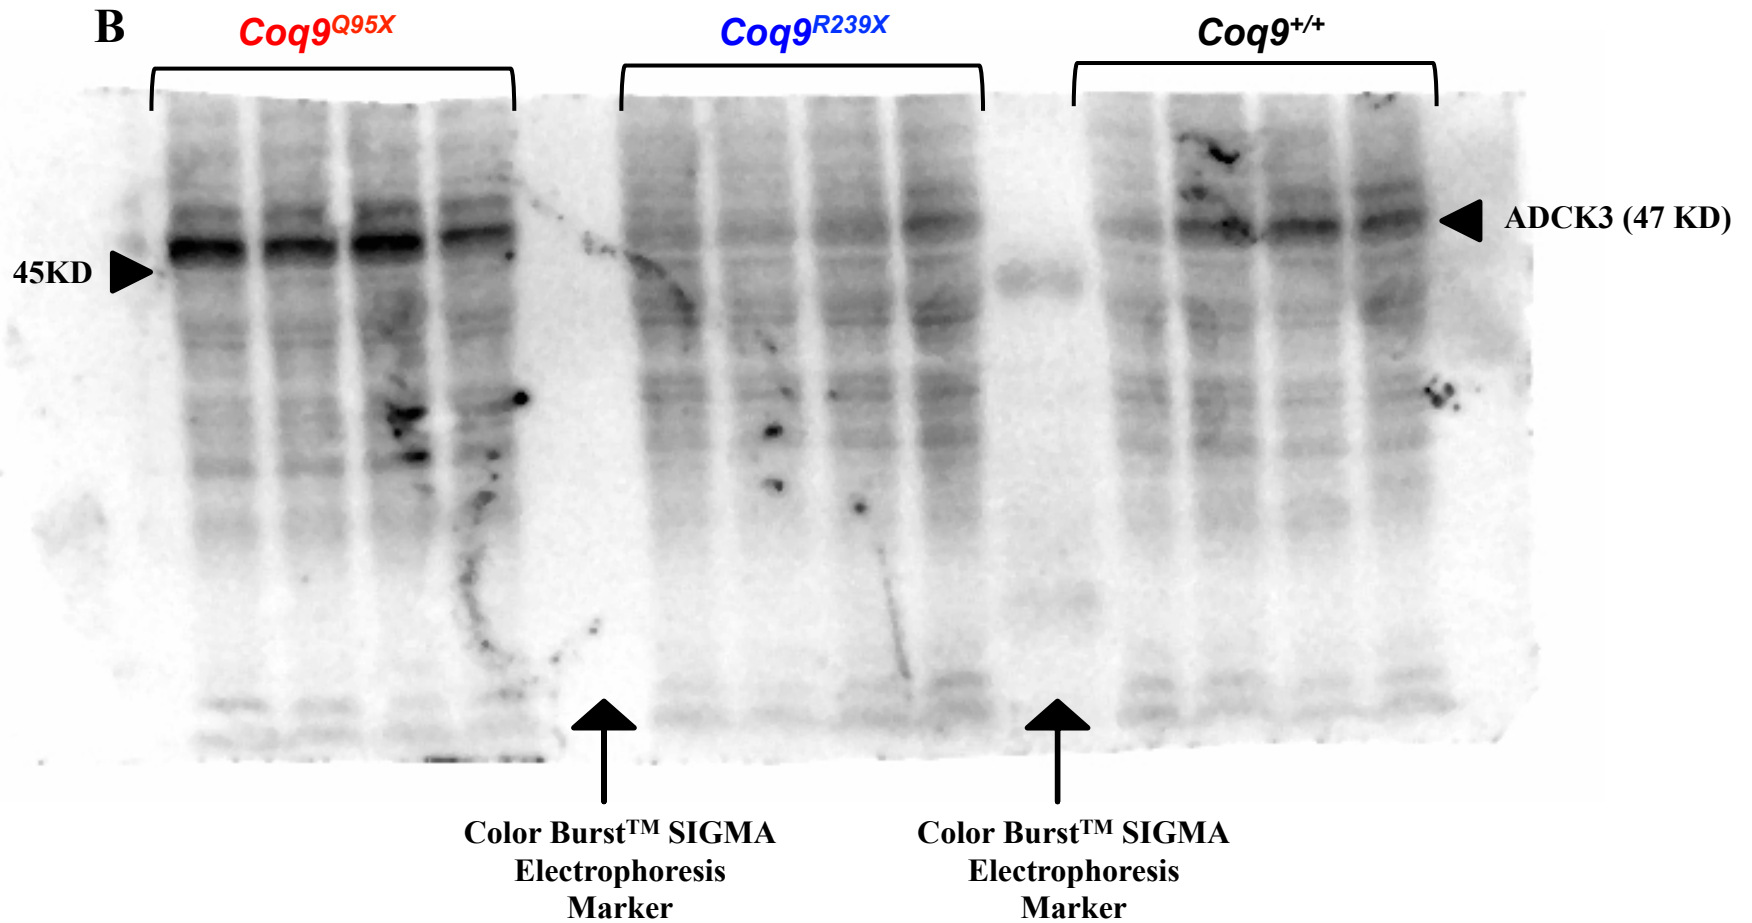

**Figure 5. Panel C. Levels of Coq biosynthetic proteins**

(C) Kidney western blot of COQ5.

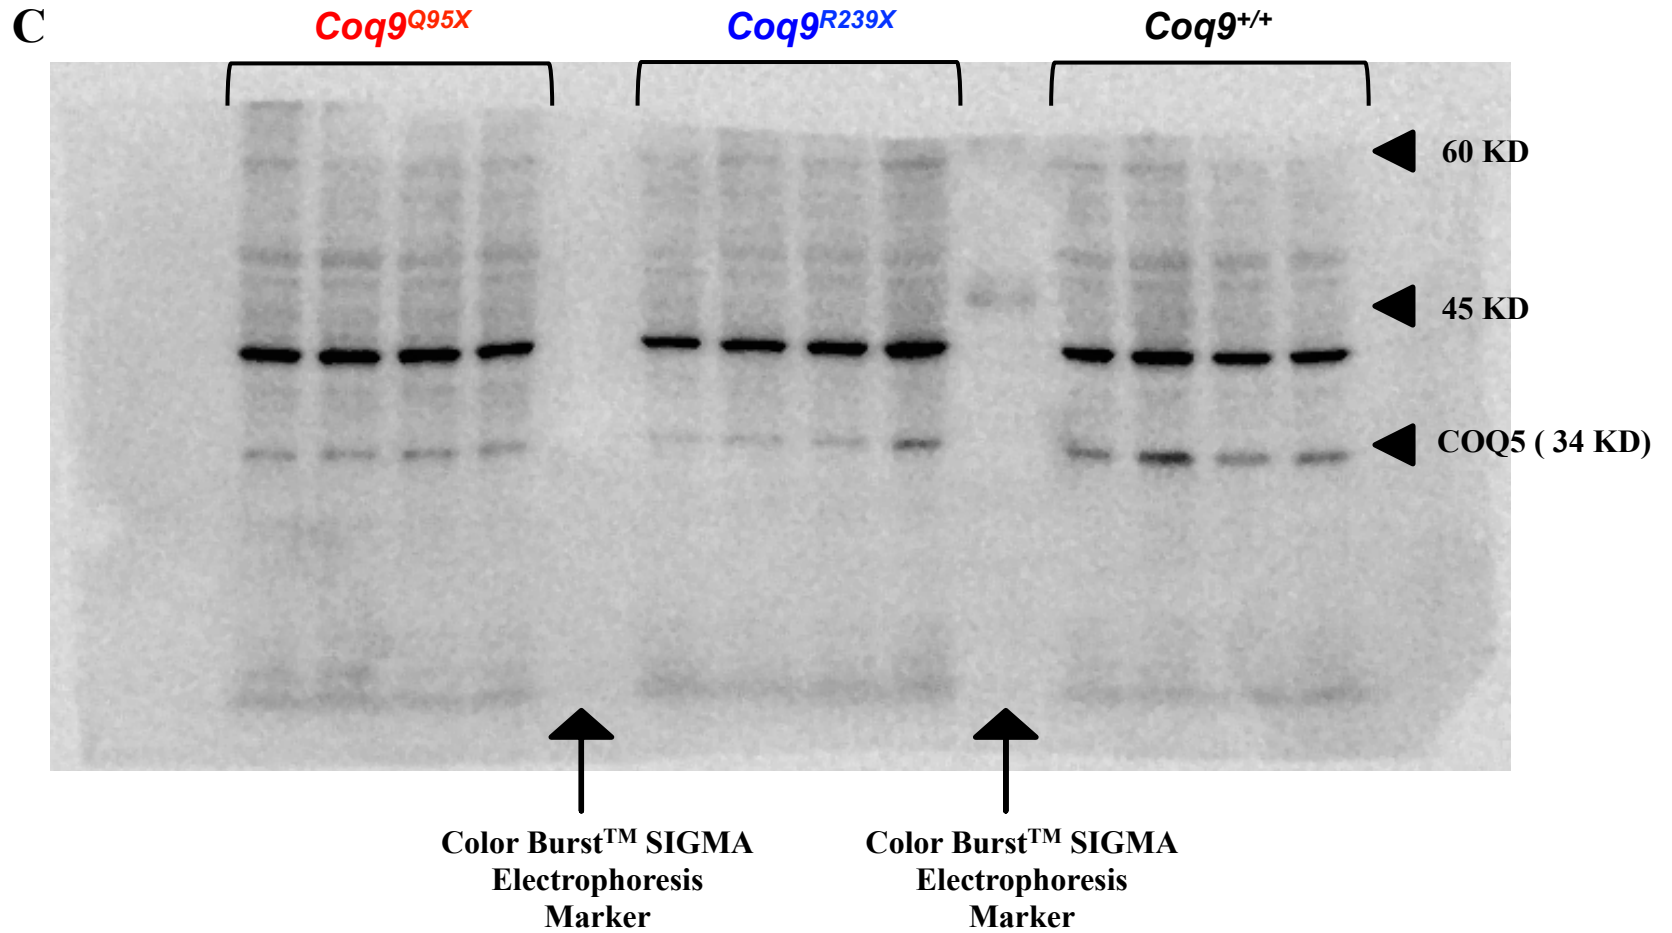

**Figure 5. Panel D. Levels of Coq biosynthetic proteins**

(D) Kidney western blot of COQ6.

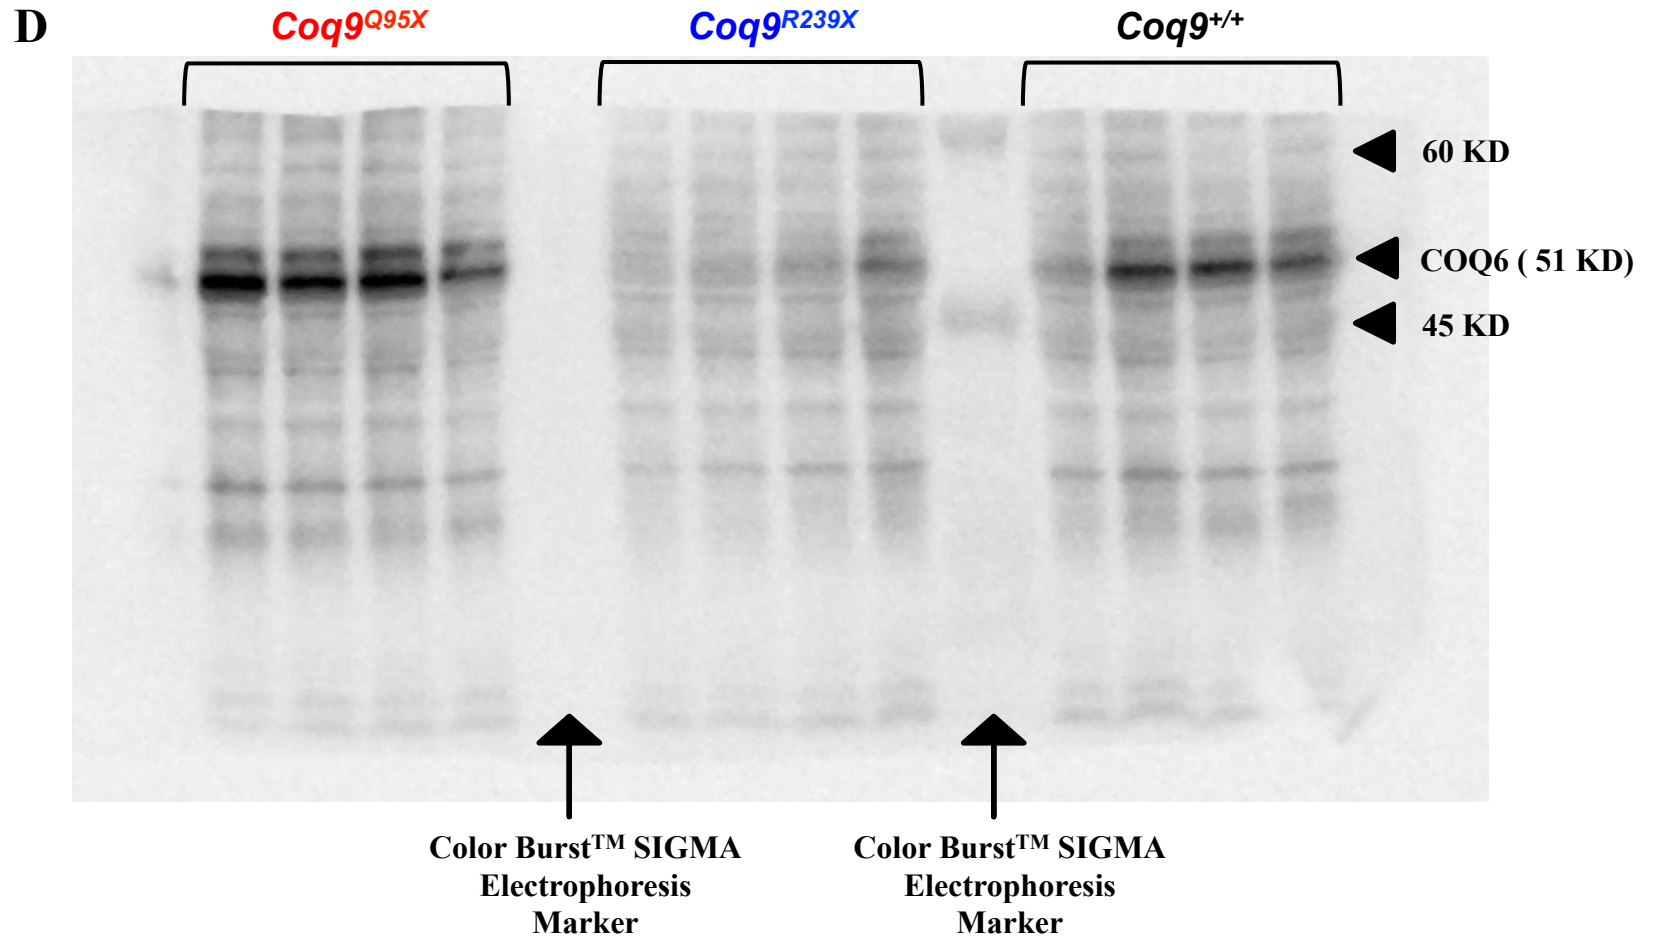

**Figure 5. Panel E. Levels of Coq biosynthetic proteins**

(E) *T. surae* western blot of COQ7.

**E**

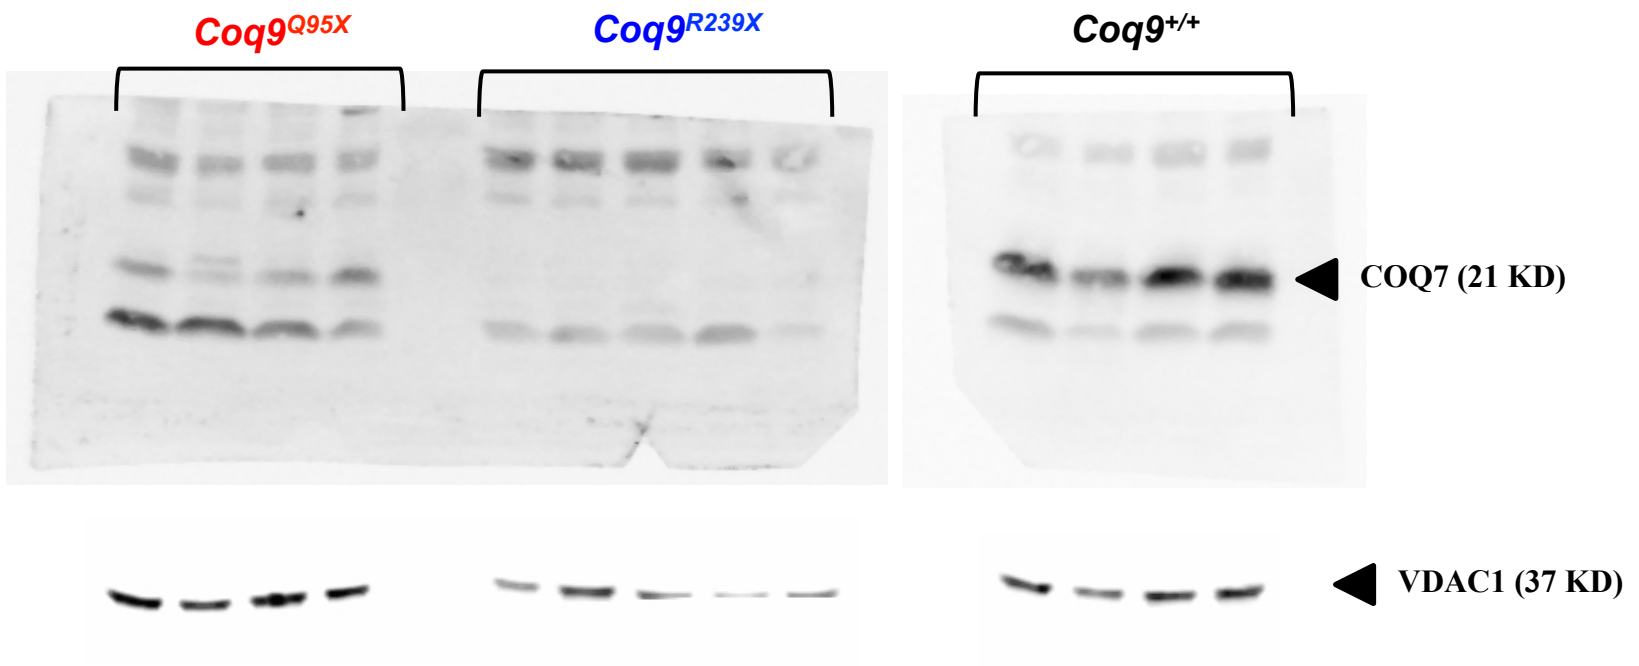

**Figure 5. Panel F. Levels of Coq biosynthetic proteins**

(F) *T. surae* western blot of ADCK3.

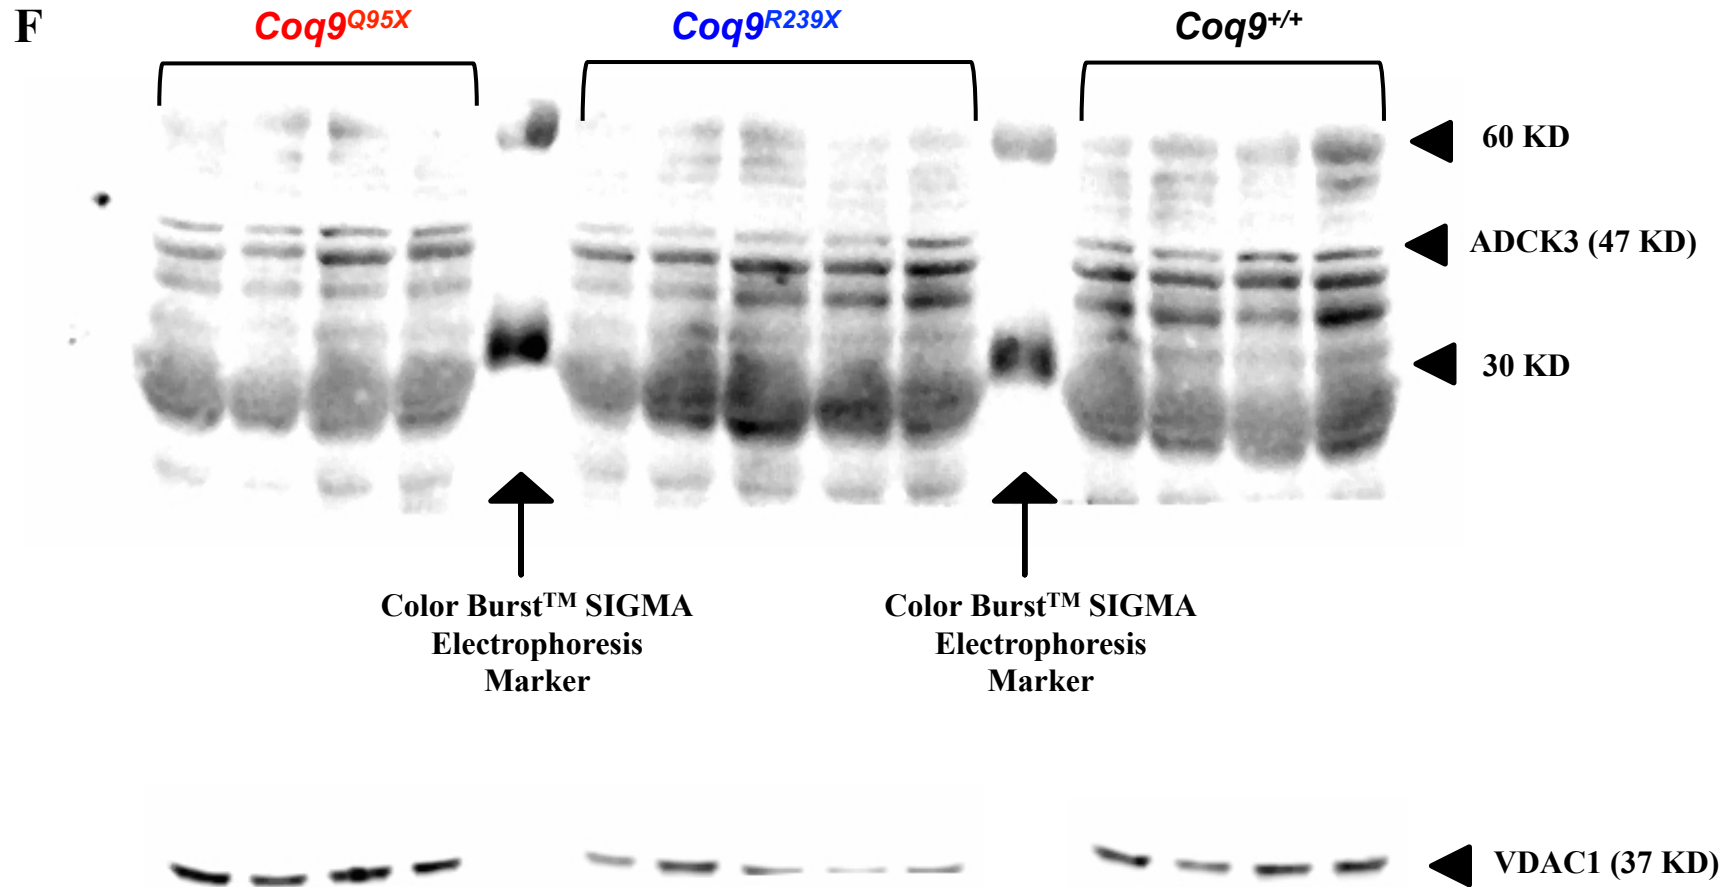

**Figure 5. Panel G. Levels of Coq biosynthetic proteins**

(G) *T. surae* western blot of COQ5.

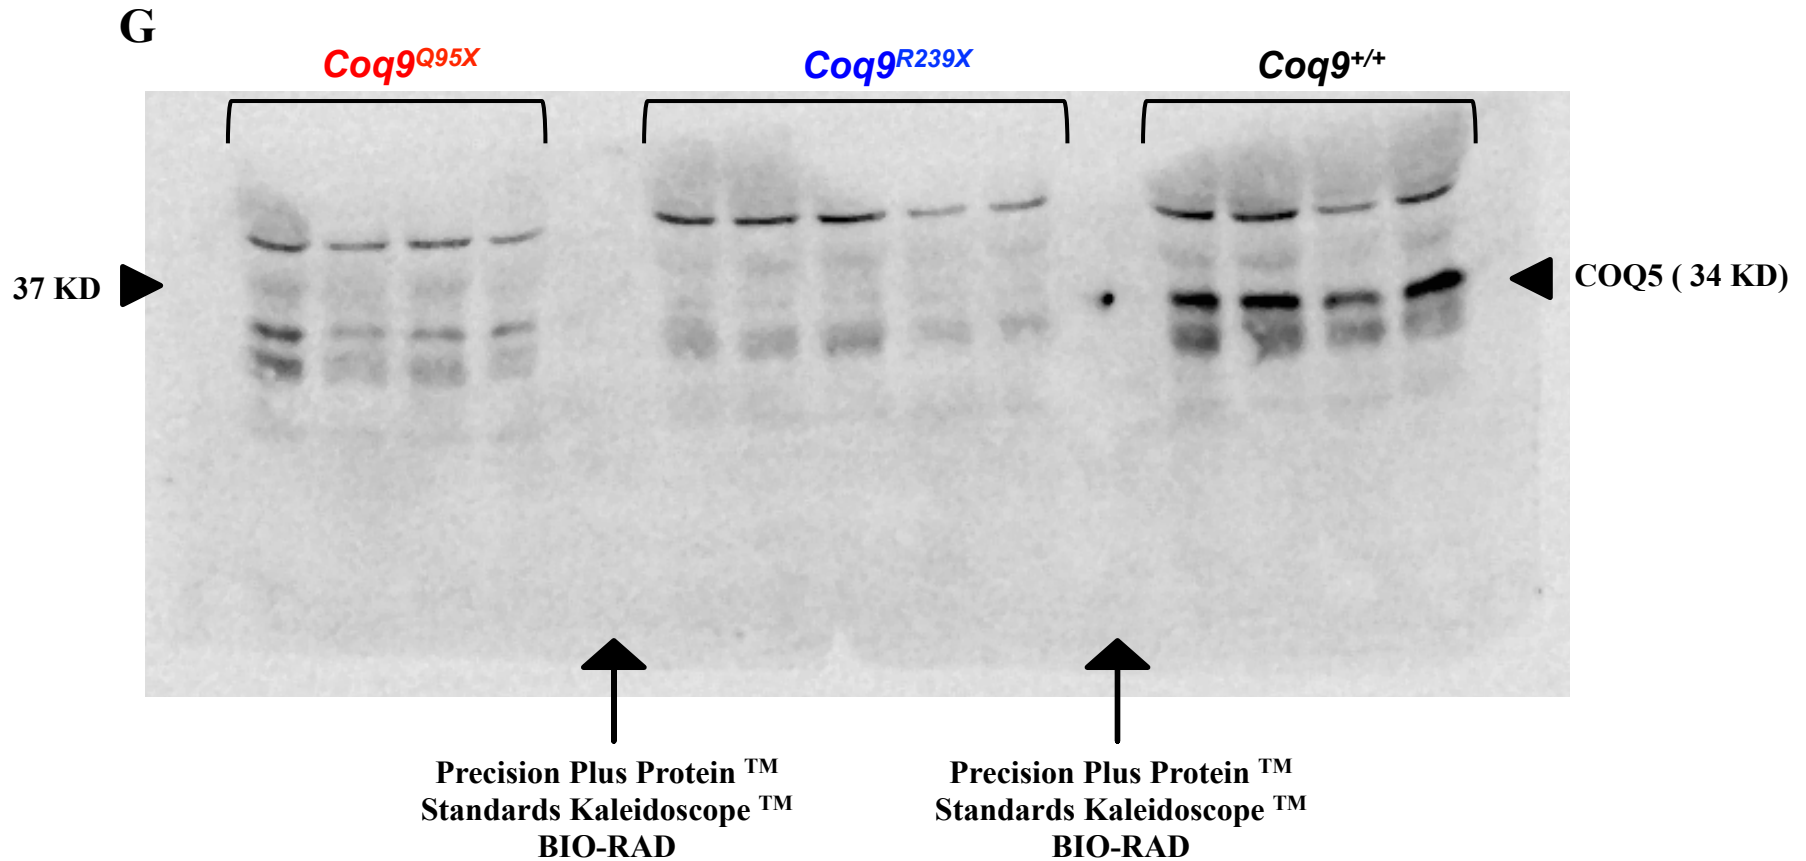

**Figure 5. Panel H. Levels of Coq biosynthetic proteins**

(H) *T. surae* western blot of COQ6.

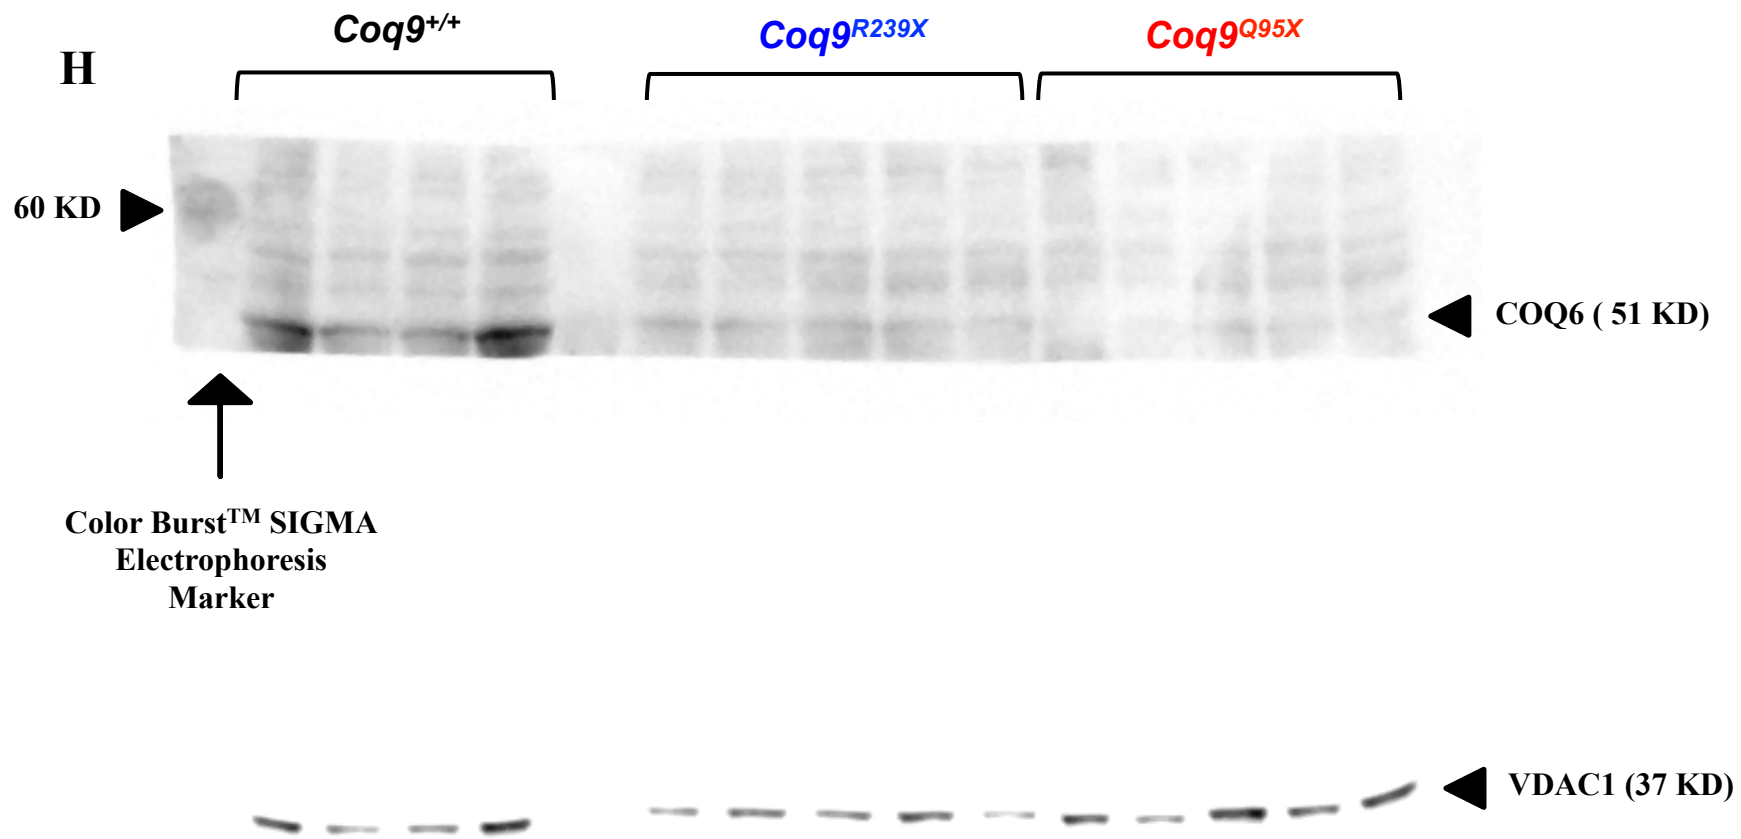

Supplement: emmm0007-0670-sd19.pdf [file emmm0007-0670-sd19.pdf]
