# Supplementary material for: The clinical heterogeneity of coenzyme Q10 deficiency results from genotypic differences in the Coq9 gene
Source: PubMed Central journal article supplement (PMC4492823; doi:10.15252/emmm.201404632), 2015-03-23

**Figure 6. Panel L. Blue-native gel electrophoresis (BNGE) of mitochondrial supercomplexes .**

(L) Muscle (BNGE) of mitochondrial supercomplexes

**L**

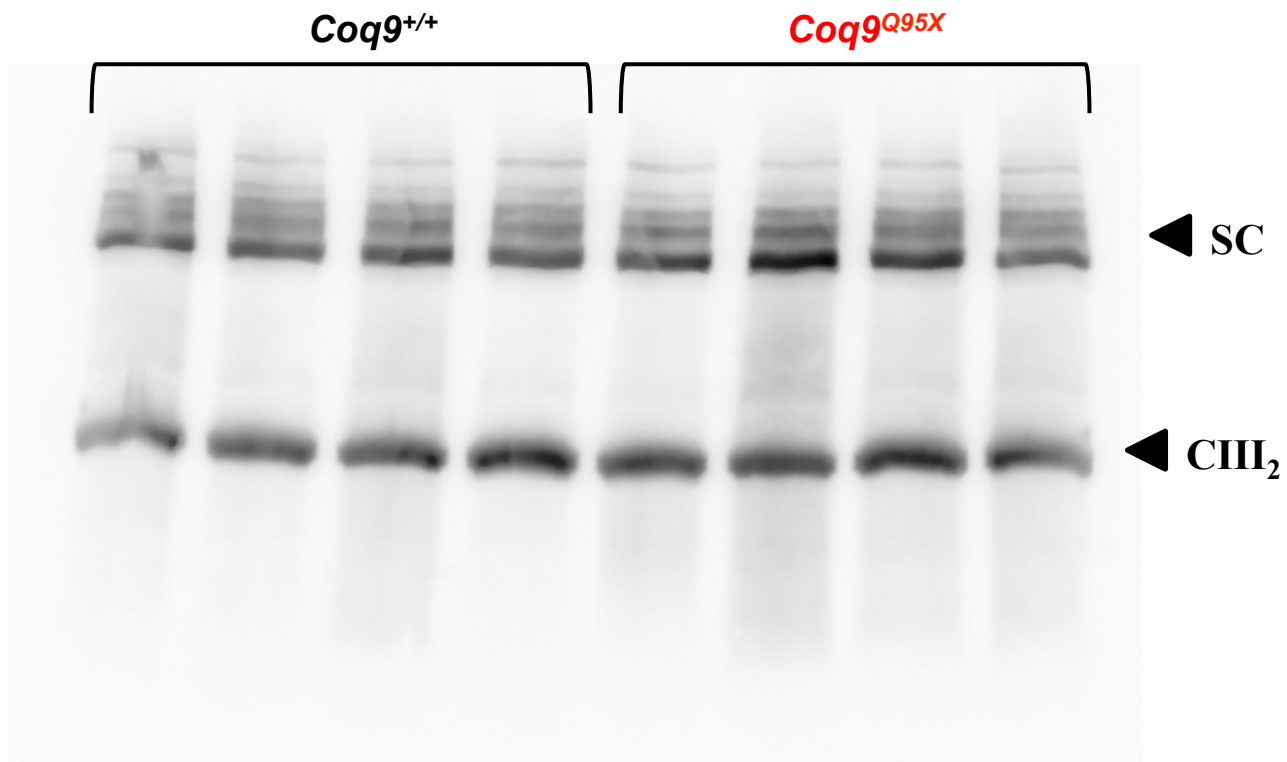

Supplement: emmm0007-0670-sd20.pdf [file emmm0007-0670-sd20.pdf]
